# Supplementary material for: Cell Population Kinetics of Collagen Scaffolds in Ex Vivo Oral Wound Repair
Source: PLoS One. 2014 Nov 14;9(11):e112680. doi: 10.1371/journal.pone.0112680 (PMC4232419; doi:10.1371/journal.pone.0112680)
Supplement: Table S7 — Corresponding data on down-regulated genes. Table S7 shows the corresponding data of the down-regulated genes in figure 6. (XLSX) [file pone.0112680.s007.xlsx]

## Sheet: Tabelle1
Table S7: Underlying data on down-regulated genes (mRNA levels relative to gel type scaffold of the corresponding day)
ITGA2						TIMP2
Day	Sponge type scaffold	Sponge type scaffold PDGF	Gel type scaffold	Gel type scaffold PDGF		Day	Sponge type scaffold	Sponge type scaffold PDGF	Gel type scaffold	Gel type scaffold PDGF
1	-1.04319	-1.6077	-1	-1.22944		1	-0.70271	-1.9066	-1	-1.06437
4	-1.80125	-2.57041	-1	-1.40932		4	-1.60325	-1.63127	-1	-0.865736
7	-2.7283	-2.9363	-1	-0.89751		7	-1.38799	-2.09217	-1	-1.34444
10	-1.79502	-3.48704	-1	-1.22604		10	-1.12117	-1.48452	-1	-0.739694
14	-2.0548	-2.96494	-1	-0.778085		14	-1.48555	-1.71238	-1	-1.30949
MMP14						TIMP1
Day	Sponge type scaffold	Sponge type scaffold PDGF	Gel type scaffold	Gel type scaffold PDGF		Day	Sponge type scaffold	Sponge type scaffold PDGF	Gel type scaffold	Gel type scaffold PDGF
1	-0.615999	-0.900003	-1	-0.735094		1	-1.28254	-1.83655	-1	-1.55617
4	-1.07029	-1.20414	-1	-0.425727		4	-1.30676	-1.84676	-1	-1.16797
7	-1.71594	-2.45717	-1	-1.46408		7	-1.38799	-2.4777	-1	-1.2466
10	-1.59439	-2.00416	-1	-0.69834		10	-1.22774	-1.54435	-1	-0.578344
14	-1.8302	-1.54542	-1	-1.13288		14	-1.70882	-2.40995	-1	-1.03025
MMP2						TIMP3
Day	Sponge type scaffold	Sponge type scaffold PDGF	Gel type scaffold	Gel type scaffold PDGF		Day	Sponge type scaffold	Sponge type scaffold PDGF	Gel type scaffold	Gel type scaffold PDGF
1	-0.625031	-1.56374	-1	-0.807762		1	-1.14314	-1.26664	-1	-1.1321
4	-1.35943	-2.05053	-1	-0.923382		4	-1.44393	-3.49429	-1	-1.62789
7	-1.67946	-1.85961	-1	-1.19997		7	-1.10343	-1.84676	-1	-0.917003
10	-1.3435	-1.72788	-1	-0.842063		10	-1.31221	-2.2595	-1	-0.93045
14	-1.59881	-1.83274	-1	-1.2033		14	-1.39959	-1.87125	-1	-1.01255
